# Supplementary material for: Cost Dynamics of Clean Energy Technologies
Source: Springer Nature journal article supplement (doi:10.1007/s41471-021-00114-8), 2021-06-01

## Online Appendix

### Symbols and Acronyms

#### Cost and Price Parameters

Table 4 provides a comprehensive list of input parameters used for estimating the learning curves of system price components of all four clean energy technologies. The corresponding source for each data vector is provided in the last row of the table.

Tables 5–9 provide a comprehensive list of annual input parameters and corresponding sources for our calculations of the LCOE of solar and wind energy in California and Germany. For solar PV and wind power facilities in California, system prices and fixed operating cost reflect average values of respective plants installed across the entire United States in the particular year, adjusted for the price level in California using averaged city cost indexes by RSMears (2020). System prices for solar PV and wind turbines are taken from Bolinger et al. (2020) and Wiser et al. (2020), respectively. Fixed operating cost are calculated for either energy

**Table 3** List of symbols and acronyms

|                    |                                                            |
|--------------------|------------------------------------------------------------|
| $b$                | Learning parameter                                         |
| BOS                | Balance of system                                          |
| $c$                | Unit cost of capacity ( $\$/\text{kWh}^{-1}$ )             |
| $\text{CO}_2$      | Carbon dioxide                                             |
| $^{\circ}\text{C}$ | Degree Celcius                                             |
| $\Delta$           | Tax factor (–)                                             |
| $f$                | Levelized fixed operating cost ( $\$/\text{kWh}^{-1}$ )    |
| GW                 | Gigawatts                                                  |
| IPCC               | Intergovernmental Panel on Climate Change                  |
| LCOE               | Levelized cost of electricity ( $\$/\text{kWh}^{-1}$ )     |
| LCOH               | Levelized cost of hydrogen ( $\$/\text{kg}^{-1}$ )         |
| kWh                | Kilowatt hour                                              |
| MW                 | Megawatts                                                  |
| MWh                | Megawatt hours                                             |
| $n$                | Number of years                                            |
| $P$                | Sales price per unit of equipment                          |
| PEM                | Polymer electrolyte membrane                               |
| PV                 | Photovoltaic                                               |
| $Q$                | Quantity of cumulative industry output                     |
| $T(\cdot)$         | Number of transistors                                      |
| $w$                | Levelized variable operating cost ( $\$/\text{kWh}^{-1}$ ) |
| W                  | Watt                                                       |
| WACC               | Weighted average cost of capital                           |
| Wh                 | Watt hours                                                 |

source from data by ABB (2020). Annual average capacity factors of solar PV and wind energy facilities in California are calculated based on reported hourly capacity factors of individual plants in a particular year as provided by ABB (2020).

For solar PV and wind power plants in Germany, system prices and fixed operating cost reflect average values of respective facilities in Germany in the particular year. System prices for solar PV and wind turbines are collected from IRENA (2020) as

**Table 4** Global system prices and cumulative installed capacity

| Year | Solar PV                              |                  | Onshore Wind                          |                  | Li-ion Batteries                     |                   | PEM Electrolysis                      |                  |
|------|---------------------------------------|------------------|---------------------------------------|------------------|--------------------------------------|-------------------|---------------------------------------|------------------|
|      | Module Price<br>(\$kW <sup>-1</sup> ) | Capacity<br>(MW) | System Price<br>(\$kW <sup>-1</sup> ) | Capacity<br>(MW) | Pack Price<br>(\$kWh <sup>-1</sup> ) | Capacity<br>(MWh) | System Price<br>(\$kW <sup>-1</sup> ) | Capacity<br>(MW) |
| 1976 | 81 616                                | 4                | –                                     | –                | –                                    | –                 | –                                     | –                |
| 1977 | 61 568                                | 6                | –                                     | –                | –                                    | –                 | –                                     | –                |
| 1978 | 42 477                                | 9                | –                                     | –                | –                                    | –                 | –                                     | –                |
| 1979 | 31 729                                | 13               | –                                     | –                | –                                    | –                 | –                                     | –                |
| 1980 | 26 062                                | 19               | –                                     | –                | –                                    | –                 | –                                     | –                |
| 1981 | 20 502                                | 27               | –                                     | –                | –                                    | –                 | –                                     | –                |
| 1982 | 18 433                                | 39               | –                                     | –                | –                                    | –                 | –                                     | –                |
| 1983 | 15 593                                | 59               | 5 179                                 | 274              | –                                    | –                 | –                                     | –                |
| 1984 | 13 906                                | 81               | 4 898                                 | 680              | –                                    | –                 | –                                     | –                |
| 1985 | 12 951                                | 107              | 4 799                                 | 995              | –                                    | –                 | –                                     | –                |
| 1986 | 10 407                                | 135              | 4 229                                 | 1 354            | –                                    | –                 | –                                     | –                |
| 1987 | 7 901                                 | 164              | 4 090                                 | 1 469            | –                                    | –                 | –                                     | –                |
| 1988 | 7 028                                 | 198              | 3 141                                 | 1 465            | –                                    | –                 | –                                     | –                |
| 1989 | 7 766                                 | 238              | 2 943                                 | 1 655            | –                                    | –                 | –                                     | –                |
| 1990 | 8 331                                 | 285              | 3 318                                 | 1 943            | –                                    | –                 | –                                     | –                |
| 1991 | 8 093                                 | 340              | 3 264                                 | 2 392            | –                                    | –                 | –                                     | –                |
| 1992 | 7 570                                 | 400              | 3 211                                 | 2 587            | –                                    | –                 | –                                     | –                |
| 1993 | 7 499                                 | 460              | 3 214                                 | 2 930            | –                                    | –                 | –                                     | –                |
| 1994 | 6 750                                 | 530              | 2 975                                 | 3 527            | –                                    | –                 | –                                     | –                |
| 1995 | 6 131                                 | 610              | 2 720                                 | 4 763            | –                                    | –                 | –                                     | –                |
| 1996 | 6 488                                 | 699              | 2 587                                 | 6 007            | –                                    | –                 | –                                     | –                |
| 1997 | 6 785                                 | 825              | 2 447                                 | 7 482            | –                                    | –                 | –                                     | –                |
| 1998 | 6 761                                 | 978              | 2 432                                 | 9 667            | –                                    | –                 | –                                     | –                |
| 1999 | 5 704                                 | 1 179            | 2 269                                 | 13 700           | –                                    | –                 | –                                     | –                |
| 2000 | 5 465                                 | 1 469            | 2 217                                 | 18 039           | –                                    | –                 | –                                     | –                |
| 2001 | 5 690                                 | 1 860            | 2 075                                 | 24 322           | –                                    | –                 | –                                     | –                |
| 2002 | 5 126                                 | 2 385            | 2 055                                 | 31 181           | –                                    | –                 | –                                     | –                |
| 2003 | 4 556                                 | 3 075            | 1 955                                 | 39 295           | –                                    | –                 | –                                     | –                |
| 2004 | 4 477                                 | 3 971            | 1 966                                 | 47 678           | –                                    | –                 | 6 360                                 | 0.007            |
| 2005 | 4 620                                 | 5 344            | 1 859                                 | 59 009           | –                                    | –                 | 3 762                                 | 0.040            |
| 2006 | 4 842                                 | 6 845            | 1 895                                 | 74 109           | –                                    | –                 | 3 219                                 | 0.057            |
| 2007 | 4 402                                 | 9 618            | 1 921                                 | 93 916           | –                                    | –                 | 3 191                                 | 0.140            |
| 2008 | 4 622                                 | 16 166           | 2 018                                 | 120 888          | –                                    | –                 | 3 628                                 | 0.224            |
| 2009 | 2 313                                 | 23 833           | 2 051                                 | 159 744          | –                                    | –                 | 2 730                                 | 0.233            |

**Table 4** (Continued)

|         |      |        |      |        |        |        |      |        |
|---------|------|--------|------|--------|--------|--------|------|--------|
| 2010    | 1961 | 41925  | 1949 | 196104 | 1125   | 426    | 2571 | 0.245  |
| 2011    | 1022 | 70240  | 1939 | 235184 | 886    | 1982   | 2295 | 0.511  |
| 2012    | 656  | 100201 | 1972 | 279670 | 703    | 4734   | 2239 | 0.639  |
| 2013    | 802  | 141661 | 1828 | 313882 | 651    | 10396  | 2807 | 2.480  |
| 2014    | 709  | 186661 | 1781 | 364978 | 571    | 20714  | 2593 | 2.812  |
| 2015    | 673  | 242661 | 1642 | 427244 | 400    | 41036  | 2643 | 11.000 |
| 2016    | 440  | 318972 | 1635 | 476300 | 277    | 70805  | 1844 | 12.951 |
| 2017    | 389  | 417972 | 1628 | 524137 | 217    | 111682 | 1572 | 18.045 |
| 2018    | 275  | 525972 | 1549 | 569596 | 190    | 200000 | 1188 | 28.369 |
| 2019    | 255  | 626920 | 1473 | 624626 | 154    | 351000 | 1064 | 48.713 |
| Sources | [1]  | [1]    | [2]  | [2, 3] | [4, 5] | [1, 6] | [7]  | [8]    |

[1] BNEF (2019b), [2] IRENA (2020), [3] Pitteloud (2019), [4] BNEF (2020), [5] Comello and Reichelstein (2019), [6] Schmidt et al. (2019), [7] Glenk and Reichelstein (2019, 2020), [8] IEA (2019), \$-values are in 2019 \$US

**Table 5** Levelized cost dynamics for solar PV in California

| In 2019 \$US                                     | Source    | 2010  | 2011  | 2012  | 2013  | 2014  | 2015  | 2016  | 2017  | 2018  | 2019  |
|--------------------------------------------------|-----------|-------|-------|-------|-------|-------|-------|-------|-------|-------|-------|
| Input Parameters                                 |           |       |       |       |       |       |       |       |       |       |       |
| Useful life-time (years)                         | [1]       | 30    | 30    | 30    | 30    | 30    | 30    | 30    | 30    | 30    | 30    |
| System price (\$kW <sup>-1</sup> )               | [9]       | 5396  | 4485  | 4088  | 3504  | 2967  | 2593  | 2161  | 1986  | 1565  | 1343  |
| Fixed operating cost (\$kW <sup>-1</sup> )       | [2]       | 14.03 | 12.21 | 12.39 | 12.90 | 11.28 | 9.15  | 6.92  | 6.79  | 8.27  | 8.81  |
| Variable operating cost (\$¢ kWh <sup>-1</sup> ) |           | 0.00  | 0.00  | 0.00  | 0.00  | 0.00  | 0.00  | 0.00  | 0.00  | 0.00  | 0.00  |
| Capacity utilization rate (%)                    | [2]       | 21.04 | 21.04 | 20.83 | 21.78 | 26.75 | 27.67 | 27.67 | 29.23 | 29.59 | 28.69 |
| Cost of capital (%)                              | [3,10]    | 6.04  | 5.78  | 5.47  | 5.46  | 5.25  | 4.92  | 4.68  | 4.80  | 5.15  | 4.50  |
| Degradation factor (%)                           | [1, 4, 5] | 99.50 | 99.50 | 99.50 | 99.50 | 99.50 | 99.50 | 99.50 | 99.50 | 99.50 | 99.50 |
| Investment tax credit (%)                        |           | 0.00  | 0.00  | 0.00  | 0.00  | 0.00  | 0.00  | 0.00  | 0.00  | 0.00  | 0.00  |
| ITC capitalization (%)                           |           | 50.00 | 50.00 | 50.00 | 50.00 | 50.00 | 50.00 | 50.00 | 50.00 | 50.00 | 50.00 |
| Production tax credit (\$¢ kWh <sup>-1</sup> )   |           | 0.00  | 0.00  | 0.00  | 0.00  | 0.00  | 0.00  | 0.00  | 0.00  | 0.00  | 0.00  |
| State tax rate (%)                               | [6]       | 8.84  | 8.84  | 8.84  | 8.84  | 8.84  | 8.84  | 8.84  | 8.84  | 8.84  | 8.84  |
| Federal tax rate (%)                             | [7]       | 35.00 | 35.00 | 35.00 | 35.00 | 35.00 | 35.00 | 35.00 | 35.00 | 21.00 | 21.00 |

**Table 5** (Continued)

|                                                       |     |       |       |       |       |       |      |      |      |      |      |
|-------------------------------------------------------|-----|-------|-------|-------|-------|-------|------|------|------|------|------|
| State tax depreciation method (-) <sup>a</sup>        | [8] | 3     | 3     | 3     | 3     | 3     | 3    | 3    | 3    | 3    | 3    |
| Federal tax depreciation method (-) <sup>a</sup>      | [8] | 2     | 2     | 2     | 2     | 2     | 2    | 2    | 2    | 5    | 5    |
| Levelized Cost                                        |     |       |       |       |       |       |      |      |      |      |      |
| Cost of capacity, $c$ ( $\$/\text{kWh}^{-1}$ )        |     | 22.47 | 18.18 | 16.20 | 13.26 | 8.94  | 7.28 | 5.91 | 5.21 | 4.22 | 3.47 |
| Tax factor, $\Delta$ (-)                              |     | 1.13  | 1.12  | 1.12  | 1.12  | 1.11  | 1.11 | 1.10 | 1.10 | 1.03 | 1.03 |
| Fixed operating cost, $f$ ( $\$/\text{kWh}^{-1}$ )    |     | 0.80  | 0.70  | 0.72  | 0.71  | 0.51  | 0.40 | 0.30 | 0.28 | 0.34 | 0.37 |
| Variable operating cost, $w$ ( $\$/\text{kWh}^{-1}$ ) |     | 0.00  | 0.00  | 0.00  | 0.00  | 0.00  | 0.00 | 0.00 | 0.00 | 0.00 | 0.00 |
| LCOE ( $\$/\text{kWh}^{-1}$ )                         |     | 26.10 | 21.08 | 18.80 | 15.51 | 10.45 | 8.46 | 6.81 | 6.03 | 4.70 | 3.95 |

<sup>a</sup>2: 5 year MACRS DDB depreciation, 3: 20 year 150%-declining balance depreciation, 5: 100% bonus depreciation.

[1] Comello et al. (2020), [2] ABB (2020), [3] Steffen (2020), [4] Jordan et al. (2012), [5] Wisser and Bolinger (2016), [6] Tax Foundation (2020), [7] Tax Foundation (2012), [8] U.S. IRS (2019), [9] Bolinger et al. (2020), [10] Wisser et al. (2020)

are fixed operating cost for wind power plants. Fixed operating cost for solar PV facilities are calculated from data by Steffen et al. (2020). Annual average capacity factors of solar PV and wind energy facilities in Germany are calculated based on reported average capacity factors of individual plants in a particular year as provided by BMWi (2020) and IRENA (2020) for solar and wind, respectively.

## Sensitivities

Tables 10–12 provide a comprehensive list of the annual input parameters and corresponding sources for the sensitivity calculations of the LCOE for solar, wind and PEM electrolyzers in Germany. We analyzed the impact of a more conservative WACC of 3% in 2019. Figs. 5–11 visualize the more conservative learning curves.

**Funding** We gratefully acknowledge financial support through the Deutsche Forschungsgemeinschaft (DFG, German Research Foundation) – Project-ID 403041268 – TRR 266, the Konrad-Adenauer Stiftung and the Joachim Herz Stiftung.

**Acknowledgements** Helpful comments were provided by Stefanie Burgahn, Stephen Comello, Nikolas Wöfling, and colleagues at the University of Mannheim and Stanford University. We also thank Yadira Funk, Lucas Politycki, and Philipp Scherer for providing valuable assistance with data collection and processing.

**Table 6** Levelized cost dynamics for onshore wind in California

| In 2019 \$US                                               | Source | 2010  | 2011  | 2012  | 2013  | 2014  | 2015  | 2016  | 2017  | 2018  | 2019  |
|------------------------------------------------------------|--------|-------|-------|-------|-------|-------|-------|-------|-------|-------|-------|
| <b>Input Parameters</b>                                    |        |       |       |       |       |       |       |       |       |       |       |
| Useful life-time (years)                                   | [1]    | 30    | 30    | 30    | 30    | 30    | 30    | 30    | 30    | 30    | 30    |
| System price (\$kW <sup>-1</sup> )                         | [10]   | 2927  | 2805  | 2532  | 2382  | 2198  | 2000  | 2044  | 1959  | 1747  | 1678  |
| Fixed operating cost (\$kW <sup>-1</sup> )                 | [2]    | 28.75 | 32.94 | 21.30 | 25.27 | 22.10 | 20.04 | 24.35 | 25.76 | 23.07 | 21.94 |
| Variable operating cost (\$¢ kWh <sup>-1</sup> )           |        | 0.00  | 0.00  | 0.00  | 0.00  | 0.00  | 0.00  | 0.00  | 0.00  | 0.00  | 0.00  |
| Capacity utilization rate (%)                              | [2]    | 27.84 | 34.05 | 32.13 | 34.25 | 31.62 | 30.99 | 33.69 | 32.44 | 37.74 | 34.70 |
| Cost of capital (%)                                        | [3,10] | 6.04  | 5.78  | 5.47  | 5.46  | 5.25  | 4.92  | 4.68  | 4.80  | 5.15  | 4.50  |
| Degradation factor (%)                                     | [5,10] | 99.20 | 99.20 | 99.20 | 99.20 | 99.20 | 99.20 | 99.20 | 99.20 | 99.20 | 99.20 |
| Investment tax credit (%)                                  | [7]    | 0.00  | 0.00  | 0.00  | 0.00  | 0.00  | 0.00  | 0.00  | 0.00  | 0.00  | 0.00  |
| ITC capitalization (%)                                     | [1]    | 50.00 | 50.00 | 50.00 | 50.00 | 50.00 | 50.00 | 50.00 | 50.00 | 50.00 | 50.00 |
| Production tax credit (\$¢ kWh <sup>-1</sup> )             |        | 0.00  | 0.00  | 0.00  | 0.00  | 0.00  | 0.00  | 0.00  | 0.00  | 0.00  | 0.00  |
| State tax rate (%)                                         | [6]    | 8.84  | 8.84  | 8.84  | 8.84  | 8.84  | 8.84  | 8.84  | 8.84  | 8.84  | 8.84  |
| Federal tax rate (%)                                       | [7]    | 35.00 | 35.00 | 35.00 | 35.00 | 35.00 | 35.00 | 35.00 | 35.00 | 21.00 | 21.00 |
| State tax depreciation method (-) <sup>a</sup>             | [8]    | 3     | 3     | 3     | 3     | 3     | 3     | 3     | 3     | 3     | 3     |
| Federal tax depreciation method (-) <sup>a</sup>           | [8]    | 2     | 2     | 2     | 2     | 2     | 2     | 2     | 2     | 5     | 5     |
| <b>Levelized Cost</b>                                      |        |       |       |       |       |       |       |       |       |       |       |
| Cost of capacity, <i>c</i> (\$¢ kWh <sup>-1</sup> )        |        | 9.49  | 7.24  | 6.71  | 5.91  | 5.78  | 5.18  | 4.74  | 4.78  | 3.81  | 3.70  |
| Tax factor, $\Delta$ (-)                                   |        | 1.13  | 1.12  | 1.12  | 1.12  | 1.11  | 1.11  | 1.10  | 1.10  | 1.03  | 1.03  |
| Fixed operating cost, <i>f</i> (\$¢ kWh <sup>-1</sup> )    |        | 1.28  | 1.20  | 0.82  | 0.92  | 0.87  | 0.80  | 0.90  | 0.99  | 0.76  | 0.79  |
| Variable operating cost, <i>w</i> (\$¢ kWh <sup>-1</sup> ) |        | 2.04  | 2.03  | 2.04  | 2.08  | 2.05  | 2.05  | 2.05  | 1.67  | 1.07  | 0.70  |

**Table 6** (Continued)

|                                  |       |      |      |      |      |      |      |      |      |      |
|----------------------------------|-------|------|------|------|------|------|------|------|------|------|
| LCOE<br>(\$¢ kWh <sup>-1</sup> ) | 11.96 | 9.32 | 8.31 | 7.51 | 7.29 | 6.53 | 6.12 | 6.27 | 4.70 | 4.61 |
|----------------------------------|-------|------|------|------|------|------|------|------|------|------|

<sup>a</sup>2: 5 year MACRS DDB depreciation, 3: 20 year 150%-declining balance depreciation, 5: 100% bonus depreciation.

[1] Comello et al. (2020), [2] ABB (2020), [3] Steffen (2020), [4] Jordan et al. (2012), [5] Wisser and Bolinger (2016), [6] Tax Foundation (2020), [7] Tax Foundation (2012), [8] U.S. IRS (2019), [9] Bolinger et al. (2020), [10] Wisser et al. (2020).

**Table 7** Levelized cost dynamics for solar PV in Germany

| In 2019 \$US                                               | Source    | 2010  | 2011  | 2012  | 2013  | 2014  | 2015  | 2016  | 2017  | 2018  | 2019  |
|------------------------------------------------------------|-----------|-------|-------|-------|-------|-------|-------|-------|-------|-------|-------|
| Input Parameters                                           |           |       |       |       |       |       |       |       |       |       |       |
| Useful life-time (years)                                   | [1]       | 30    | 30    | 30    | 30    | 30    | 30    | 30    | 30    | 30    | 30    |
| System price (\$kW <sup>-1</sup> )                         | [2]       | 3705  | 2959  | 2341  | 2007  | 1600  | 1280  | 1162  | 1114  | 1113  | 899   |
| Fixed operating cost (\$kW <sup>-1</sup> )                 | [3]       | 35.51 | 31.60 | 27.69 | 23.79 | 19.88 | 15.97 | 12.06 | 8.15  | 7.73  | 7.34  |
| Variable operating cost (\$¢ kWh <sup>-1</sup> )           |           | 0.00  | 0.00  | 0.00  | 0.00  | 0.00  | 0.00  | 0.00  | 0.00  | 0.00  | 0.00  |
| Capacity utilization rate (%)                              | [4]       | 7.44  | 8.63  | 8.84  | 9.64  | 10.86 | 11.27 | 10.69 | 10.63 | 11.57 | 10.80 |
| Cost of capital (%)                                        | [5]       | 4.60  | 4.15  | 3.70  | 4.20  | 3.68  | 3.15  | 2.63  | 2.42  | 2.21  | 2.00  |
| Degradation factor (%)                                     | [1, 6, 7] | 99.50 | 99.50 | 99.50 | 99.50 | 99.50 | 99.50 | 99.50 | 99.50 | 99.50 | 99.50 |
| Federal tax rate (%)                                       |           | 30.00 | 30.00 | 30.00 | 30.00 | 30.00 | 30.00 | 30.00 | 30.00 | 30.00 | 30.00 |
| Federal tax depreciation method (-) <sup>a</sup>           | [8]       | 1     | 1     | 1     | 1     | 1     | 1     | 1     | 1     | 1     | 1     |
| Levelized Cost                                             |           |       |       |       |       |       |       |       |       |       |       |
| Cost of capacity, <i>c</i> (\$¢ kWh <sup>-1</sup> )        |           | 37.34 | 24.39 | 17.87 | 14.90 | 9.91  | 7.16  | 6.41  | 6.02  | 5.38  | 4.52  |
| Tax factor, $\Delta$ (-)                                   |           | 1.15  | 1.14  | 1.13  | 1.14  | 1.13  | 1.11  | 1.10  | 1.09  | 1.09  | 1.08  |
| Fixed operating cost, <i>f</i> (\$¢ kWh <sup>-1</sup> )    |           | 5.76  | 4.42  | 3.79  | 2.98  | 2.22  | 1.72  | 1.37  | 0.93  | 0.81  | 0.83  |
| Variable operating cost, <i>w</i> (\$¢ kWh <sup>-1</sup> ) |           | 0.00  | 0.00  | 0.00  | 0.00  | 0.00  | 0.00  | 0.00  | 0.00  | 0.00  | 0.00  |
| LCOE (\$¢ kWh <sup>-1</sup> )                              |           | 48.79 | 32.26 | 23.98 | 20.00 | 13.40 | 9.70  | 8.41  | 7.50  | 6.65  | 5.70  |

<sup>a</sup>1: 20 year linear depreciation schedule, 2: 16 year linear depreciation schedule.

[1] Comello et al. (2020), [2] IRENA (2020), [3] Steffen et al. (2020), [4] BMWi (2020), [5] Steffen (2020), [6] Jordan et al. (2012), [7] Wisser and Bolinger (2016), [8] BMF (2000)

**Table 8** Levelized cost dynamics for onshore wind in Germany

| In 2019 \$US                                               | Source    | 2010  | 2011  | 2012  | 2013  | 2014  | 2015  | 2016  | 2017  | 2018  | 2019  |
|------------------------------------------------------------|-----------|-------|-------|-------|-------|-------|-------|-------|-------|-------|-------|
| <b>Input Parameters</b>                                    |           |       |       |       |       |       |       |       |       |       |       |
| Useful life-time (years)                                   | [1]       | 30    | 30    | 30    | 30    | 30    | 30    | 30    | 30    | 30    | 30    |
| System price (\$kW <sup>-1</sup> )                         | [2]       | 2271  | 2271  | 2063  | 2038  | 2011  | 1973  | 1936  | 1935  | 1904  | 1762  |
| Fixed operating cost (\$kW <sup>-1</sup> )                 | [2]       | 73.00 | 73.00 | 68.00 | 68.00 | 64.00 | 64.00 | 56.00 | 53.63 | 51.25 | 48.88 |
| Variable operating cost (\$¢ kWh <sup>-1</sup> )           |           | 0.00  | 0.00  | 0.00  | 0.00  | 0.00  | 0.00  | 0.00  | 0.00  | 0.00  | 0.00  |
| Capacity utilization rate (%)                              | [2]       | 24.00 | 24.00 | 24.00 | 24.10 | 25.30 | 26.10 | 26.90 | 27.10 | 31.30 | 31.10 |
| Cost of capital (%)                                        | [3]       | 4.60  | 4.70  | 3.90  | 3.90  | 4.00  | 3.30  | 2.70  | 2.47  | 2.23  | 2.00  |
| Degradation factor (%)                                     | [1, 4, 5] | 99.50 | 99.50 | 99.50 | 99.50 | 99.50 | 99.50 | 99.50 | 99.50 | 99.50 | 99.50 |
| Federal tax rate (%)                                       |           | 30.00 | 30.00 | 30.00 | 30.00 | 30.00 | 30.00 | 30.00 | 30.00 | 30.00 | 30.00 |
| Federal tax depreciation method (-) <sup>a</sup>           | [6]       | 2     | 2     | 2     | 2     | 2     | 2     | 2     | 2     | 2     | 2     |
| <b>Levelized Cost</b>                                      |           |       |       |       |       |       |       |       |       |       |       |
| Cost of capacity, <i>c</i> (\$¢ kWh <sup>-1</sup> )        |           | 7.09  | 7.17  | 5.94  | 5.84  | 5.56  | 4.86  | 4.29  | 4.13  | 3.41  | 3.08  |
| Tax factor, $\Delta$ (-)                                   |           | 1.13  | 1.13  | 1.11  | 1.11  | 1.12  | 1.10  | 1.08  | 1.08  | 1.07  | 1.06  |
| Fixed operating cost, <i>f</i> (\$¢ kWh <sup>-1</sup> )    |           | 3.67  | 3.67  | 3.43  | 3.41  | 3.06  | 2.97  | 2.53  | 2.41  | 1.99  | 1.91  |
| Variable operating cost, <i>w</i> (\$¢ kWh <sup>-1</sup> ) |           | 0.00  | 0.00  | 0.00  | 0.00  | 0.00  | 0.00  | 0.00  | 0.00  | 0.00  | 0.00  |
| LCOE (\$¢ kWh <sup>-1</sup> )                              |           | 11.68 | 11.79 | 10.04 | 9.92  | 9.26  | 8.31  | 7.18  | 6.85  | 5.65  | 5.19  |

<sup>a</sup>1: 20 year linear depreciation schedule, 2: 16 year linear depreciation schedule.

[1] Comello et al. (2020), [2] IRENA (2020), [3] Steffen (2020), [4] Jordan et al. (2012), [5] Wisser and Bolinger (2016), [6] BMF (2000)

**Table 9** Levelized cost dynamics for PEM electrolysis in Germany

| In 2019 \$US                                            | Source | 2010   | 2011   | 2012   | 2013   | 2014   | 2015   | 2016   | 2017   | 2018   | 2019   |
|---------------------------------------------------------|--------|--------|--------|--------|--------|--------|--------|--------|--------|--------|--------|
| <b>Input Parameters</b>                                 |        |        |        |        |        |        |        |        |        |        |        |
| Useful life-time (years)                                | [1]    | 25     | 25     | 25     | 25     | 25     | 25     | 25     | 25     | 25     | 25     |
| System price (\$kW <sup>-1</sup> )                      | [1]    | 2571   | 2295   | 2239   | 2807   | 2593   | 2643   | 1844   | 1572   | 1188   | 1064   |
| Fixed operating cost (\$kW <sup>-1</sup> )              | [1]    | 77.13  | 68.86  | 67.18  | 84.22  | 77.78  | 79.30  | 55.32  | 47.17  | 35.64  | 31.91  |
| Variable operating cost (\$kg <sup>-1</sup> )           | [1]    | 0.0019 | 0.0019 | 0.0019 | 0.0020 | 0.0020 | 0.0020 | 0.0021 | 0.0021 | 0.0021 | 0.0022 |
| Conv. rate to hydrogen (kg kWh <sup>-1</sup> )          | [1, 2] | 0.0166 | 0.0169 | 0.0172 | 0.0174 | 0.0177 | 0.0180 | 0.0183 | 0.0186 | 0.0189 | 0.0192 |
| Avg. electr. buying price (\$¢ kWh <sup>-1</sup> )      |        | 6.20   | 6.95   | 5.72   | 5.00   | 4.28   | 4.06   | 3.66   | 4.20   | 5.29   | 4.42   |
| Opt. capacity utilization rate (%)                      |        | 97.20  | 98.72  | 95.00  | 96.31  | 97.97  | 98.49  | 93.50  | 88.70  | 72.51  | 75.84  |
| Cost of capital (%)                                     | [3]    | 4.60   | 4.70   | 3.90   | 3.90   | 4.00   | 3.30   | 2.70   | 2.47   | 2.23   | 2.00   |
| Degradation factor (%)                                  | [4]    | 98.40  | 98.40  | 98.40  | 98.40  | 98.40  | 98.40  | 98.40  | 98.40  | 98.40  | 98.40  |
| Federal tax rate (%)                                    |        | 30.00  | 30.00  | 30.00  | 30.00  | 30.00  | 30.00  | 30.00  | 30.00  | 30.00  | 30.00  |
| Federal tax depreciation method (-) <sup>a</sup>        | [5]    | 2      | 2      | 2      | 2      | 2      | 2      | 2      | 2      | 2      | 2      |
| <b>Levelized Cost</b>                                   |        |        |        |        |        |        |        |        |        |        |        |
| Cost of capacity, <i>c</i> (\$kg <sup>-1</sup> )        |        | 1.44   | 1.26   | 1.16   | 1.41   | 1.27   | 1.18   | 0.80   | 0.69   | 0.62   | 0.51   |
| Tax factor, $\Delta$ (-)                                |        | 1.13   | 1.13   | 1.11   | 1.11   | 1.12   | 1.10   | 1.08   | 1.08   | 1.07   | 1.06   |
| Fixed operating cost, <i>f</i> (\$kg <sup>-1</sup> )    |        | 0.64   | 0.55   | 0.55   | 0.67   | 0.60   | 0.60   | 0.43   | 0.38   | 0.35   | 0.30   |
| Variable operating cost, <i>w</i> (\$kg <sup>-1</sup> ) |        | 3.77   | 4.20   | 3.30   | 2.87   | 2.47   | 2.33   | 1.99   | 2.12   | 2.45   | 2.10   |
| LCOH (\$kg <sup>-1</sup> )                              |        | 6.04   | 6.18   | 5.14   | 5.11   | 4.49   | 4.23   | 3.29   | 3.25   | 3.46   | 2.93   |

<sup>a</sup>1: 20 year linear depreciation schedule, 2: 16 year linear depreciation schedule.

[1] Glenk and Reichelstein (2020), [2] IEA (2019), [3] Steffen (2020), [4] Buttler and Spliethoff (2018), [5] BMF (2000)



**Table 10** Levelized cost dynamics for solar PV in Germany – 3% WACC

| In 2019 \$US                                               | Source    | 2010  | 2011  | 2012  | 2013  | 2014  | 2015  | 2016  | 2017  | 2018  | 2019  |
|------------------------------------------------------------|-----------|-------|-------|-------|-------|-------|-------|-------|-------|-------|-------|
| <b>Input Parameters</b>                                    |           |       |       |       |       |       |       |       |       |       |       |
| Useful life-time (years)                                   | [1]       | 30    | 30    | 30    | 30    | 30    | 30    | 30    | 30    | 30    | 30    |
| System price (\$kW <sup>-1</sup> )                         | [2]       | 3705  | 2959  | 2341  | 2007  | 1600  | 1280  | 1162  | 1114  | 1113  | 899   |
| Fixed operating cost (\$kW <sup>-1</sup> )                 | [3]       | 35.51 | 31.60 | 27.69 | 23.79 | 19.88 | 15.97 | 12.06 | 8.15  | 7.73  | 7.34  |
| Variable operating cost (\$¢ kWh <sup>-1</sup> )           |           | 0.00  | 0.00  | 0.00  | 0.00  | 0.00  | 0.00  | 0.00  | 0.00  | 0.00  | 0.00  |
| Capacity utilization rate (%)                              | [4]       | 7.44  | 8.63  | 8.84  | 9.64  | 10.86 | 11.27 | 10.69 | 10.63 | 11.57 | 10.80 |
| Cost of capital (%)                                        | [5]       | 4.60  | 4.15  | 3.70  | 4.20  | 3.68  | 3.54  | 3.41  | 3.27  | 3.16  | 3.00  |
| Degradation factor (%)                                     | [1, 6, 7] | 99.50 | 99.50 | 99.50 | 99.50 | 99.50 | 99.50 | 99.50 | 99.50 | 99.50 | 99.50 |
| Federal tax rate (%)                                       |           | 30.00 | 30.00 | 30.00 | 30.00 | 30.00 | 30.00 | 30.00 | 30.00 | 30.00 | 30.00 |
| Federal tax depreciation method (–) <sup>a</sup>           | [8]       | 1     | 1     | 1     | 1     | 1     | 1     | 1     | 1     | 1     | 1     |
| <b>Levelized Cost</b>                                      |           |       |       |       |       |       |       |       |       |       |       |
| Cost of capacity, <i>c</i> (\$¢ kWh <sup>-1</sup> )        |           | 37.34 | 24.39 | 17.87 | 14.90 | 9.91  | 7.16  | 6.41  | 6.02  | 5.38  | 4.52  |
| Tax factor, $\Delta$ (–)                                   |           | 1.15  | 1.14  | 1.13  | 1.14  | 1.13  | 1.11  | 1.10  | 1.09  | 1.09  | 1.08  |
| Fixed operating cost, <i>f</i> (\$¢ kWh <sup>-1</sup> )    |           | 5.76  | 4.42  | 3.79  | 2.98  | 2.22  | 1.72  | 1.37  | 0.93  | 0.81  | 0.83  |
| Variable operating cost, <i>w</i> (\$¢ kWh <sup>-1</sup> ) |           | 0.00  | 0.00  | 0.00  | 0.00  | 0.00  | 0.00  | 0.00  | 0.00  | 0.00  | 0.00  |
| LCOE (\$¢ kWh <sup>-1</sup> )                              |           | 48.79 | 32.26 | 23.98 | 20.00 | 13.40 | 10.20 | 9.30  | 8.42  | 7.60  | 6.50  |

<sup>a</sup>1: 20 year linear depreciation schedule, 2: 16 year linear depreciation schedule.

[1] Comello et al. (2020), [2] IRENA (2020), [3] Steffen et al. (2020), [4] BMWi (2020), [5] sensitivity estimation, [6] Jordan et al. (2012), [7] Wisser and Bolinger (2016), [8] BMF (2000)

**Table 11** Levelized cost dynamics for onshore wind in Germany – 3% WACC

| In 2019 \$US                                               | Source    | 2010  | 2011  | 2012  | 2013  | 2014  | 2015  | 2016  | 2017  | 2018  | 2019  |
|------------------------------------------------------------|-----------|-------|-------|-------|-------|-------|-------|-------|-------|-------|-------|
| <b>Input Parameters</b>                                    |           |       |       |       |       |       |       |       |       |       |       |
| Useful life-time (years)                                   | [1]       | 30    | 30    | 30    | 30    | 30    | 30    | 30    | 30    | 30    | 30    |
| System price (\$kW <sup>-1</sup> )                         | [2]       | 2271  | 2271  | 2063  | 2038  | 2011  | 1973  | 1936  | 1935  | 1904  | 1762  |
| Fixed operating cost (\$kW <sup>-1</sup> )                 | [2]       | 73.00 | 73.00 | 68.00 | 68.00 | 64.00 | 64.00 | 56.00 | 53.63 | 51.25 | 48.88 |
| Variable operating cost (\$¢ kWh <sup>-1</sup> )           |           | 0.00  | 0.00  | 0.00  | 0.00  | 0.00  | 0.00  | 0.00  | 0.00  | 0.00  | 0.00  |
| Capacity utilization rate (%)                              | [2]       | 24.00 | 24.00 | 24.00 | 24.10 | 25.30 | 26.10 | 26.90 | 27.10 | 31.30 | 31.10 |
| Cost of capital (%)                                        | [3]       | 4.60  | 4.70  | 3.90  | 3.90  | 4.00  | 3.30  | 3.23  | 3.15  | 3.08  | 3.00  |
| Degradation factor (%)                                     | [1, 4, 5] | 99.50 | 99.50 | 99.50 | 99.50 | 99.50 | 99.50 | 99.50 | 99.50 | 99.50 | 99.50 |
| Federal tax rate (%)                                       |           | 30.00 | 30.00 | 30.00 | 30.00 | 30.00 | 30.00 | 30.00 | 30.00 | 30.00 | 30.00 |
| Federal tax depreciation method (–) <sup>a</sup>           | [6]       | 2     | 2     | 2     | 2     | 2     | 2     | 2     | 2     | 2     | 2     |
| <b>Levelized Cost</b>                                      |           |       |       |       |       |       |       |       |       |       |       |
| Cost of capacity, <i>c</i> (\$¢ kWh <sup>-1</sup> )        |           | 7.09  | 7.17  | 5.94  | 5.84  | 5.56  | 4.86  | 4.29  | 4.13  | 3.41  | 3.08  |
| Tax factor, $\Delta$ (–)                                   |           | 1.13  | 1.13  | 1.11  | 1.11  | 1.12  | 1.10  | 1.08  | 1.08  | 1.07  | 1.06  |
| Fixed operating cost, <i>f</i> (\$¢ kWh <sup>-1</sup> )    |           | 3.67  | 3.67  | 3.43  | 3.41  | 3.06  | 2.97  | 2.53  | 2.41  | 1.99  | 1.91  |
| Variable operating cost, <i>w</i> (\$¢ kWh <sup>-1</sup> ) |           | 0.00  | 0.00  | 0.00  | 0.00  | 0.00  | 0.00  | 0.00  | 0.00  | 0.00  | 0.00  |
| LCOE (\$¢ kWh <sup>-1</sup> )                              |           | 11.68 | 11.79 | 10.04 | 9.92  | 9.26  | 8.31  | 7.55  | 7.33  | 6.14  | 5.70  |

<sup>a</sup>1: 20 year linear depreciation schedule, 2: 16 year linear depreciation schedule.

[1] Comello et al. (2020), [2] IRENA (2020), [3] sensitivity estimation, [4] Jordan et al. (2012), [5] Wisser and Bolinger (2016), [6] BMF (2000)

**Table 12** Levelized cost dynamics for PEM electrolysis in Germany – 3% WACC

| In 2019 \$US                                            | Source | 2010   | 2011   | 2012   | 2013   | 2014   | 2015   | 2016   | 2017   | 2018   | 2019   |
|---------------------------------------------------------|--------|--------|--------|--------|--------|--------|--------|--------|--------|--------|--------|
| <b>Input Parameters</b>                                 |        |        |        |        |        |        |        |        |        |        |        |
| Useful life-time (years)                                | [1]    | 25     | 25     | 25     | 25     | 25     | 25     | 25     | 25     | 25     | 25     |
| System price (\$kW <sup>-1</sup> )                      | [1]    | 2571   | 2295   | 2239   | 2807   | 2593   | 2643   | 1844   | 1572   | 1188   | 1064   |
| Fixed operating cost (\$kW <sup>-1</sup> )              | [1]    | 77.13  | 68.86  | 67.18  | 84.22  | 77.78  | 79.30  | 55.32  | 47.17  | 35.64  | 31.91  |
| Variable operating cost (\$kg <sup>-1</sup> )           | [1]    | 0.0019 | 0.0019 | 0.0019 | 0.0020 | 0.0020 | 0.0020 | 0.0021 | 0.0021 | 0.0021 | 0.0022 |
| Conv. rate to hydrogen (kg kWh <sup>-1</sup> )          | [1, 2] | 0.0166 | 0.0169 | 0.0172 | 0.0174 | 0.0177 | 0.0180 | 0.0183 | 0.0186 | 0.0189 | 0.0192 |
| Avg. electr. buying price (\$¢ kWh <sup>-1</sup> )      |        | 6.20   | 6.95   | 5.72   | 5.00   | 4.28   | 4.06   | 3.66   | 4.20   | 5.29   | 4.42   |
| Opt. capacity utilization rate (%)                      |        | 97.20  | 98.72  | 95.00  | 96.31  | 97.97  | 98.49  | 93.50  | 88.70  | 72.51  | 75.84  |
| Cost of capital (%)                                     | [3]    | 4.60   | 4.70   | 3.90   | 3.90   | 4.00   | 3.30   | 3.23   | 3.15   | 3.08   | 3.00   |
| Degradation factor (%)                                  | [4]    | 98.40  | 98.40  | 98.40  | 98.40  | 98.40  | 98.40  | 98.40  | 98.40  | 98.40  | 98.40  |
| Federal tax rate (%)                                    |        | 30.00  | 30.00  | 30.00  | 30.00  | 30.00  | 30.00  | 30.00  | 30.00  | 30.00  | 30.00  |
| Federal tax depreciation method (–) <sup>a</sup>        | [5]    | 2      | 2      | 2      | 2      | 2      | 2      | 2      | 2      | 2      | 2      |
| <b>Levelized Cost</b>                                   |        |        |        |        |        |        |        |        |        |        |        |
| Cost of capacity, <i>c</i> (\$kg <sup>-1</sup> )        |        | 1.44   | 1.26   | 1.16   | 1.41   | 1.27   | 1.18   | 0.84   | 0.74   | 0.65   | 0.54   |
| Tax factor, $\Delta$ (–)                                |        | 1.13   | 1.13   | 1.11   | 1.11   | 1.12   | 1.10   | 1.10   | 1.10   | 1.09   | 1.09   |
| Fixed operating cost, <i>f</i> (\$kg <sup>-1</sup> )    |        | 0.64   | 0.55   | 0.55   | 0.67   | 0.60   | 0.60   | 0.43   | 0.38   | 0.34   | 0.28   |
| Variable operating cost, <i>w</i> (\$kg <sup>-1</sup> ) |        | 3.77   | 4.20   | 3.30   | 2.87   | 2.47   | 2.33   | 1.99   | 2.13   | 2.48   | 2.13   |
| LCOH (\$kg <sup>-1</sup> )                              |        | 6.04   | 6.18   | 5.14   | 5.11   | 4.49   | 4.23   | 3.35   | 3.32   | 3.53   | 3.01   |

<sup>a</sup>1: 20 year linear depreciation schedule, 2: 16 year linear depreciation schedule.

[1] Glenk and Reichelstein (2020), [2] IEA (2019), [3] sensitivity estimation, [4] Buttler and Spliethoff (2018), [5] BMF (2000)

**Fig. 11** LCOE Sensitivity: Solar Power Germany

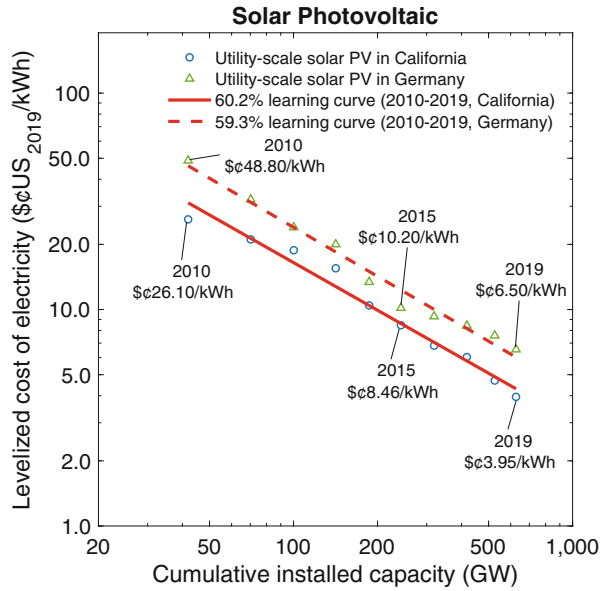

**Fig. 12** LCOE Sensitivity: Wind Power Germany

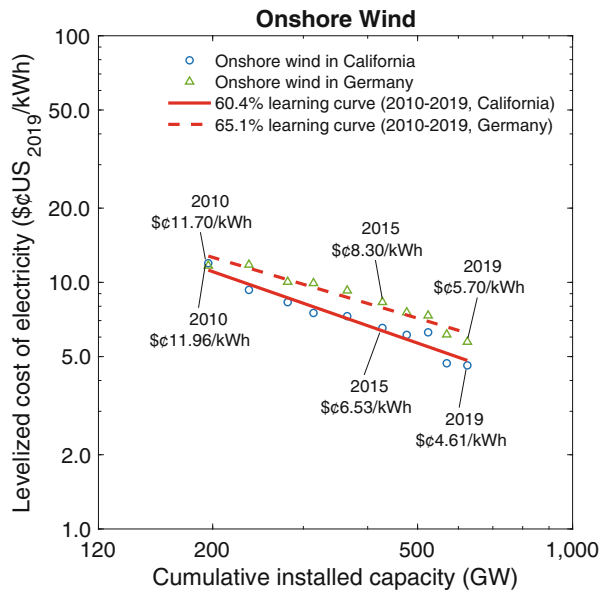

**Fig. 13** LCOH Sensitivity:  
Germany

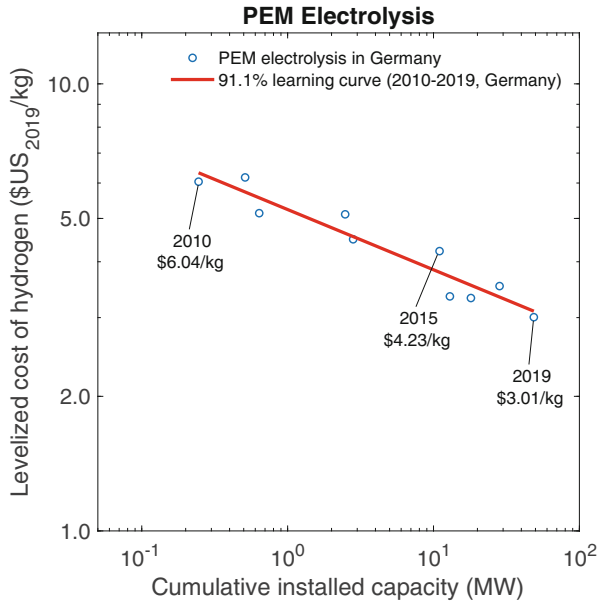

Supplement: MOESM1 [file 19641388]
